# Supplementary material
Source: Springer Nature journal article supplement (https://www.springermedizin.de/resource/supplementary/12978_2010_99_MOESM2_ESM.pdf/9602840)

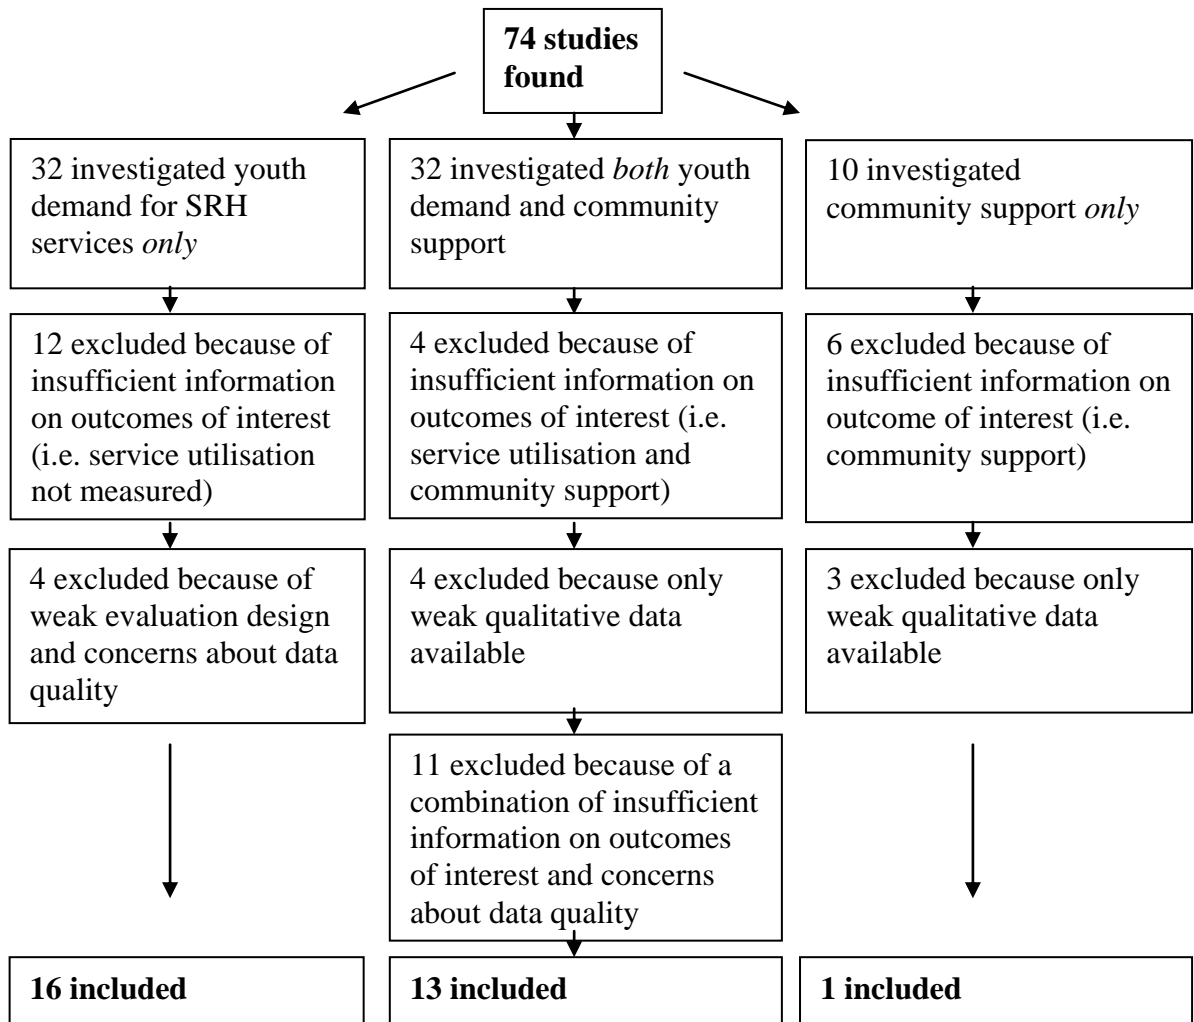

Supplement: MOESM2 [file 9602840]
